# Supplementary material
Source: HighWire-hosted journal article supplement (http://www.ghspjournal.org/highwire/filestream/1576/field_highwire_adjunct_files/0/14-00156-Cooper-Supplementary_material-brochure.pdf)
Supplement: 14-00156-Cooper-Supplementary_material-brochure.pdf [file 14-00156-Cooper-Supplementary_material-brochure.pdf]

# Good Things about Family Planning for BABY PA:

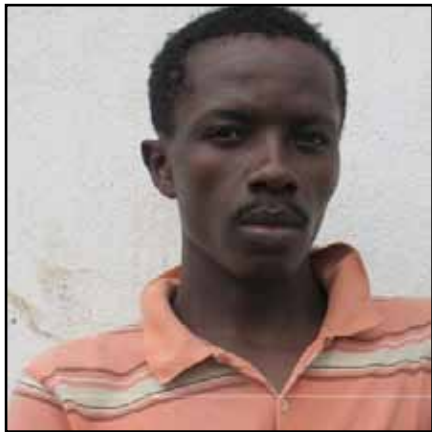

- Save money
- Better care for family and support them
- Can still do man and woman business while the baby is sucking tay-tay

# FOR FAMILY PLANNING, GO TO THE CLINIC OR HOSPITAL IN YOUR AREA.

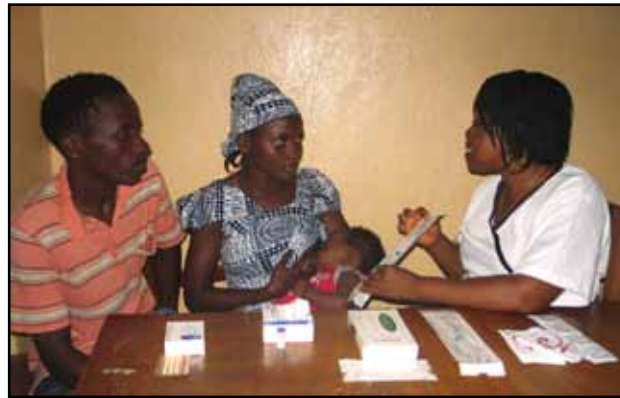

It is good for baby pa to come with baby ma.

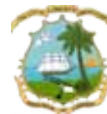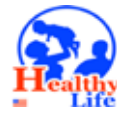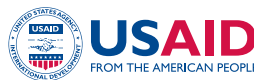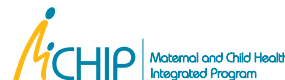

# Family Planning Is Good for the Family!

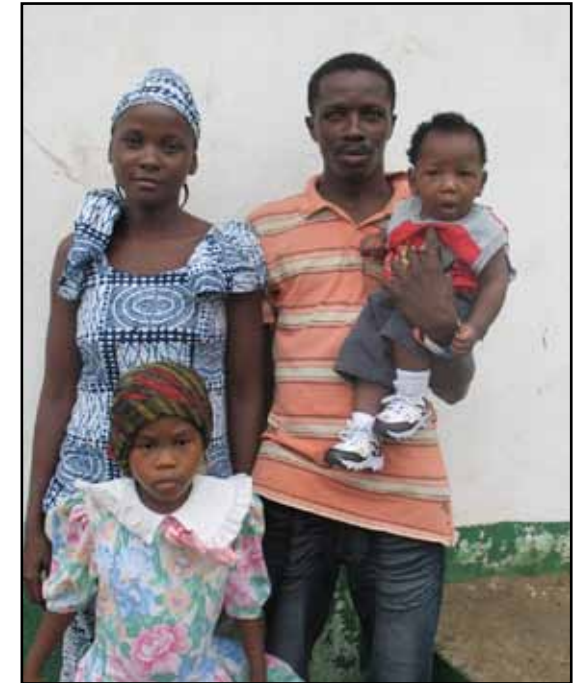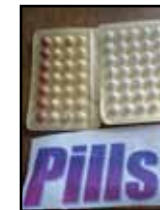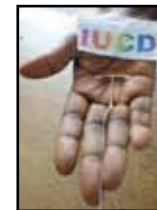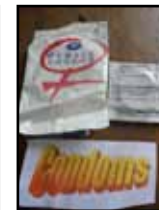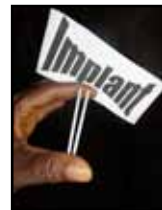

# What Is Family Planning?

It helps families put space between their children.

It can make you not to get belly until you want to have another baby.

## **FAMILY PLANNING IS:**

- Good for baby ma
- Free (no money)
- Very good in making you not to get belly

# Good Things about Family Planning for **BABY MA:**

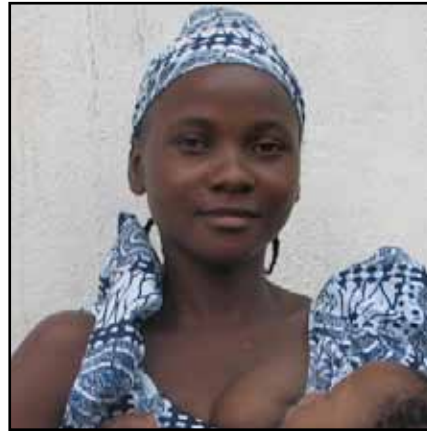

- Help you to rest
- More time for husband and other children
- Time to finish school
- Can do man and woman business and not worry about getting another belly too soon

# Good Things about Family Planning for the **BABY:**

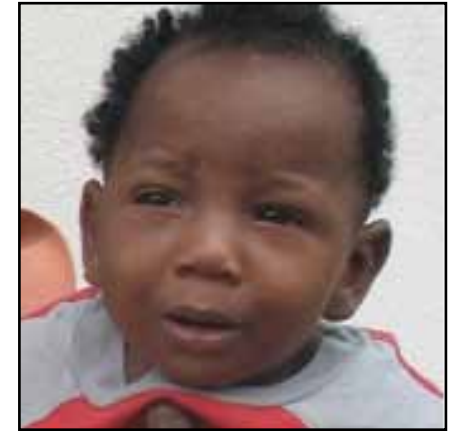

- Baby can grow good and be healthy
- Baby can still suck tay-tay for long time
- Baby can be strong and happy
